# Supplementary material for: Human papillomavirus spectrum of HPV-infected women in Nigeria: an analysis by next-generation sequencing and type-specific PCR
Source: PubMed Central journal article supplement (PMC10337082; doi:10.1186/s12985-023-02106-y), 2023-07-11
Supplement: 12985_2023_2106_MOESM1_ESM.pdf [file 12985_2023_2106_MOESM1_ESM.pdf]

**Supplementary Table S1: HPV type-specific primer sequences and product size.**

| <b>HPV TYPES</b> | <b>PRIMER SET<br/>(5'-3') FORWARD<br/>(3'-5') REVERSE</b> | <b>PRODUCT SIZE</b> |
|------------------|-----------------------------------------------------------|---------------------|
| HPV6             | TCCATTAGCCTCCACGGGTG<br>TAGTGGCCTATGGCTCGTC               | 75                  |
| HPV7             | AGTGTATTTACCACCGCCA<br>CGGGCAAGCGTACTCTAAAC               | 206                 |
| HPV11            | CGAGCAGACGTCCGTCTCG<br>GGAATACATGCGCCATGTGG               | 360                 |
| HPV16            | TCAAAGCCACTGTGTCCTGA<br>CGTGTTCCTTGATGATCTGCAA            | 119                 |
| HPV18            | CCGAGCACGACAGGAACGACT<br>TCGTTTTCTTCCTCTGAGTCGCTT         | 173                 |
| HPV14            | GGATGATGACGAACAGTGGC<br>TGAGTCTGCTTGTCTCTCTG              | 220                 |
| HPV19            | AGGAGGGCGAAAATGGAGAA<br>TAACACCCTTTCGCCTAGCA              | 166                 |
| HPV20            | GTTGTTGTTGCCAGCTACCA<br>CCTTCATCAGCGCTGTCTTC              | 209                 |
| HPV21            | AAAGTCCAAGCGGTGTCAAC<br>TGAGTCTGCTTGTCTCTCTG              | 197                 |
| HPV25            | TGTTAGGTCAGCATTCCGGT<br>GTTTCAACACGAGGCACAGT              | 223                 |
| HPV31            | CTACAGTAAGCATTGTGCTATGC<br>ACGTAATGGAGAGGTTGCAATAACCC     | 155                 |
| HPV32            | GGACATTTCTCCTCCCACCA<br>CATAGTAGGGCGAGGTCCAG              | 244                 |
| HPV33            | GCACACTCCATGCGTATCAG<br>ATGATAGATGATGTAACGCC              | 456                 |
| HPV34            | GGAGACACTGTGCAAACGTT<br>TTGCAGTCCCATTTACGTG               | 154                 |
| HPV39            | CACAGAGTCACAACGCCAAA<br>AAAGCGGGACATTGCAACAT              | 199                 |
| HPV43            | CTAAGTCCCAGGTTGCATGC<br>CCCCTCCCACACCCTTTATT              | 188                 |

|       |                                               |     |
|-------|-----------------------------------------------|-----|
| HPV45 | ACCAGATTTGTGCACAGAAT<br>TTTTTCCAGTGTCTCTCCA   | 236 |
| HPV52 | TTCAGAGTGTTGGAGACCCC<br>TGTGGCTTGTCTGCTTGTC   | 197 |
| HPV53 | GGTGGTGCCCTGTTTACAAG<br>TGTCCTTGCTGCCATCAAAC  | 209 |
| HPV56 | CAGGATTTGGCGCTATGGAC<br>CCCCAACTTTACCAGCCCTA  | 198 |
| HPV58 | TGCTGTAGAGGACTGTGTGG<br>CATTTAAGTCTGCGTCGCCA  | 188 |
| HPV59 | ATGTGCAGTACCAGTGACGA<br>GTAGACTGAGGGTGCTGTGT  | 173 |
| HPV61 | CACGACAAGCAGGACTAACG<br>ATCGTTGTGGCTGCGTATTC  | 189 |
| HPV66 | GGGTTTGGTGCAATGGACTT<br>CCCCAACATTACCTGCCCTA  | 196 |
| HPV68 | TTTTGTATGGCCGGGTTGTG<br>AGGAGATACGTTGGTTGCCA  | 212 |
| HPV70 | TGTAACCCGCCCTTCATCTT<br>TGAACCTGTGCCCAATTTG   | 213 |
| HPV71 | CCCGTCTGGCTGATGTAGAT<br>TTCGCCAATCCCCTTCTTCT  | 183 |
| HPV73 | AGACACACATCCTGGTCCAG<br>CTTTGCATCAGTAGGTCGCC  | 203 |
| HPV82 | TTGCAGGTGTTTCGAGTGTTG<br>GCCTCCACATAAAACCACCC | 191 |
| HPV84 | GGGAGGTGTATATGGGAGGC<br>CCGGTGTCTTGTGTAGAGT   | 245 |
| HPV85 | TACGAGATCTCCAGCAGCTG<br>GTCCTCGTCCTCATCCTCTG  | 194 |
| HPV86 | ATTCACCATGCATGCGACTC<br>GAATGCTCGCTTGTCTCCTG  | 213 |
| HPV87 | GAGTACTCCAGCTACGGACC<br>CAGTTGCTGCACTTTCCTGT  | 179 |
| HPV90 | CATCGCTCTAAACGTCGCAA<br>AGAAGACACCCAAGCTACCC  | 151 |
| HPV91 | GTTGTGGGCTCAAACGTCAT<br>GGCTCTCCTCCAACAGTTCT  | 230 |

|        |                                              |     |
|--------|----------------------------------------------|-----|
| HPV92  | GAAGAAACGAAAACGGGCCT<br>GCAGGCGATCACTATTTGCA | 168 |
| HPV97  | GCAAAACAACCTTGGAACGC<br>TTCAACGGTTTCTGGCACTG | 235 |
| HPV114 | TGGCACGTGTTACCATACCT<br>GCAGCAACACACTACACCAA | 204 |
| HPV118 | TGCGAGCCAGGAGAGTAAA<br>CACACGTACTCCAGGACCTT  | 236 |
| HPV152 | AACAGGAGAGTGAGGACAGC<br>AGGCGGAGGAGTATTGTCAG | 242 |
| HPV195 | TATGGGAGTGCTGGTGTGTT<br>ATGTCTGCAGGCCCAATAGT | 170 |
| HPV196 | TTAGCTCCACTGGACACTGG<br>TTGTTGCTTCTCGGTGGTTG | 182 |
| HPV220 | CCTTTACCTGCCTCCTCAA<br>CCTTATCACCCGCCACATTG  | 152 |
| HPV224 | TGGTACAGGGAGCAGTCTTG<br>GCCCTGGACGAACAATTTT  | 201 |
