# Supplementary material for: Human papillomavirus spectrum of HPV-infected women in Nigeria: an analysis by next-generation sequencing and type-specific PCR
Source: PubMed Central journal article supplement (PMC10337082; doi:10.1186/s12985-023-02106-y), 2023-07-11
Supplement: 12985_2023_2106_MOESM2_ESM.pdf [file 12985_2023_2106_MOESM2_ESM.pdf]

**Supplementary Table S2: HPV types found in the participants<sup>†</sup>**

| <b>Participant's ID</b> | <b>NGS</b>                                                     | <b>Ts-PCR</b>                                      |
|-------------------------|----------------------------------------------------------------|----------------------------------------------------|
| Patient #1              | 6, <b>18</b>                                                   | <b>18</b>                                          |
| Patient #2              | 6, <b>18</b>                                                   | <b>18</b>                                          |
| Patient #3              | 6                                                              | 6                                                  |
| Patient #4              | 6, <b>16, 18</b>                                               | <b>16</b>                                          |
| Patient #5              | 6, <b>16, 18</b>                                               | 6, <b>18</b>                                       |
| Patient #6              | 6, <b>16, 18</b>                                               | 6, <b>18</b>                                       |
| Patient #7              | 6                                                              | 6                                                  |
| Patient #8              | 6, <b>16, 18</b>                                               | 6, <b>16, 18</b>                                   |
| Patient #9              | 6, <b>16, 18</b>                                               | <b>16</b>                                          |
| Patient #10             | 6, <b>16, 18</b>                                               | 6, <b>18</b>                                       |
| Patient #11             | 71, <b>82</b>                                                  | None                                               |
| Patient #12             | 6, 71, <b>82</b>                                               | 6                                                  |
| Patient #13             | 71, <b>82</b>                                                  | None                                               |
| Patient #14             | 6                                                              | 6                                                  |
| Patient #15             | <i>14, 19, 20, 21, 25, 71, <b>82</b>, 195, 196</i>             | <i>14, 20, 21</i>                                  |
| Patient #16             | <b>16, 18, 32, 34, 85, 92</b>                                  | <b>16, 32, 92</b>                                  |
| Patient #17             | 6                                                              | 6                                                  |
| Patient #18             | <b>16</b>                                                      | <b>16</b>                                          |
| Patient #19             | 6, <b>16</b>                                                   | 6, <b>16</b>                                       |
| Patient #20             | 6, 71, <b>82</b>                                               | 6                                                  |
| Patient #21             | <i>14, 19, 20, 21, 25, 71, <b>82</b>, 152,195, 196</i>         | <i>14, 21, 71, <b>82</b>, 196</i>                  |
| Patient #22             | 71, <b>82</b>                                                  | 71, <b>82</b>                                      |
| Patient #23             | 6, 71, <b>82</b>                                               | 6, 71, <b>82</b>                                   |
| Patient #24             | 6, <i>14, 19, 20, 21, 25, 71, <b>82</b>, 152,195, 196</i>      | 21, 71, <b>82, 152</b>                             |
| Patient #25             | 6, <b>16, 18, 31, 45, 71, 82, 85, 97</b>                       | 6, <b>31, 45, 71, 82,85</b>                        |
| Patient #26             | 71                                                             | 71                                                 |
| Patient #27             | 6, <i>14, 19, 20, 21, 25, <b>66</b>, 71, <b>82</b>,196</i>     | 6, <i>14, 20, 21, <b>66</b>, 71</i>                |
| Patient #28             | 71, <b>82</b>                                                  | 71                                                 |
| Patient #29             | 6, <i>14, 19, 20, 21, 25, 71, <b>82</b>, 118, 152,195, 196</i> | 6, <i>14, 20, 21, 71, <b>82</b>, 118, 152, 196</i> |
| Patient #30             | 6, <i>14, 19, 20, 21, 25, 71, <b>82</b>, 118, 152,195, 196</i> | 6, <i>14, 20, 21, 71, 152, 196</i>                 |
| Patient #31             | 71, <b>82</b>                                                  | 71, <b>82</b>                                      |
| Patient #32             | 6, <i>14, 19, 20, 21, 25,<b>53</b>,71, <b>82</b>, 195</i>      | 6, <i>14, 20, 21,71, <b>82</b></i>                 |
| Patient #33             | <i>14, 19, 20, 21, 25, <b>18</b>, 71, <b>82</b>, 152, 196</i>  | <i>14, 20, 21, 71, <b>82</b>, 152</i>              |
| Patient #34             | 11, <b>16, 71, 82</b>                                          | 71, <b>82</b>                                      |

|             |                                                                                                       |                                         |
|-------------|-------------------------------------------------------------------------------------------------------|-----------------------------------------|
| Patient #35 | <i>14, 19, 20, 21, 25, 71, <b>82</b>, 152,195, 196</i>                                                | <i>20, 21, <b>82</b>, 152,196</i>       |
| Patient #36 | <i>6, <b>18</b>, 14, 19, 20, 21, 25, 71, <b>82</b>, 152,195, 196</i>                                  | <i>6,14, 20, 21, 71, <b>82</b>, 152</i> |
| Patient #37 | 18                                                                                                    | None                                    |
| Patient #38 | <i>14, 19, 20, 21, 25, 71, <b>82</b>, 195, 196</i>                                                    | <i>71, <b>82</b>, 196</i>               |
| Patient #39 | 71                                                                                                    | 71                                      |
| Patient #40 | <b>16, 19, 20, 71, 82</b>                                                                             | <b>16, 82</b>                           |
| Patient #41 | <i>6,14, 19, 20, 21, 25, 71, <b>82</b>, 152,195, 196</i>                                              | <i>14, 20, <b>82</b>, 152</i>           |
| Patient #42 | <i>20, 32, 71, <b>82</b></i>                                                                          | <i>20, <b>82</b></i>                    |
| Patient #43 | <b>16, 18</b>                                                                                         | None                                    |
| Patient #44 | <i>14, 19, 20, 21, 25, 71, <b>82</b>, 152,195, 196</i>                                                | <i>14, 196</i>                          |
| Patient #45 | 71, <b>82</b>                                                                                         | 71, <b>82</b>                           |
| Patient #46 | 6, 71, <b>82</b>                                                                                      | None                                    |
| Patient #47 | 6, 71, <b>82</b>                                                                                      | 6                                       |
| Patient #48 | <i><b>14, 16</b>, 19, 20, 21, 25, 71, <b>82</b>, 152,195, 196</i>                                     | <b>16</b>                               |
| Patient #49 | <b>16, 53</b>                                                                                         | <b>16</b>                               |
| Patient #50 | <b>16, 71</b>                                                                                         | <b>16</b>                               |
| Patient #51 | <b>16, 71, 82</b>                                                                                     | <b>16, 71, 82</b>                       |
| Patient #52 | <b>16, 19, 71, 82</b>                                                                                 | <b>16</b>                               |
| Patient #53 | <i>14, <b>16</b>, 19, 20, 21, 25, 71, <b>82</b>, 152,195, 196</i>                                     | <i><b>14, 16</b>, 20, 152, 196</i>      |
| Patient #54 | <i>14, <b>16</b>, 19, 20, 21, 25,31, 71, <b>82</b>, 152,195, 196</i>                                  | <i><b>14, 16</b>, 71, 152, 196</i>      |
| Patient #55 | <b>16, 71</b>                                                                                         | <b>16, 71</b>                           |
| Patient #56 | <b>16, 71, 82</b>                                                                                     | None                                    |
| Patient #57 | <i><b>14, 16</b>, 19, 20, 21, 25, 71, <b>82</b>, 152,195, 196</i>                                     | <i><b>16, 14</b></i>                    |
| Patient #58 | <i>6, 11, <b>16, 31, 45, 68, 73, 85</b>, 97,7, <b>33, 39</b>, <b>52, 58, 59</b>, 84, 86, 220, 224</i> | <i>6, <b>31, 33, 39, 52, 58, 59</b></i> |
| Patient #59 | <b>16, 71, 82</b>                                                                                     | <b>16, 82</b>                           |
| Patient #60 | <b>16, 97</b>                                                                                         | None                                    |
| Patient #61 | <i><b>14, 16</b>, 19, 20, 21, 25, 71, <b>82</b>,195, 196</i>                                          | <i>71, <b>82</b>, 196</i>               |
| Patient #62 | <b>16, 71, 82</b>                                                                                     | <b>82</b>                               |
| Patient #63 | <i>14, <b>16</b>, 19, 20,21, 71, <b>82</b></i>                                                        | <i><b>16, 14</b></i>                    |
| Patient #64 | <i>6, 20, 21, 25, 71, <b>82</b>, 195</i>                                                              | <i>6, <b>16</b></i>                     |
| Patient #65 | <b>16, 71</b>                                                                                         | None                                    |
| Patient #66 | <b>16, 71, 82</b>                                                                                     | None                                    |
| Patient #67 | <b>6, 16</b>                                                                                          | None                                    |
| Patient #68 | <b>16, 20, 71</b>                                                                                     | None                                    |
| Patient #69 | <b>16, 71, 82</b>                                                                                     | None                                    |
| Patient #70 | <b>16, 71, 82</b>                                                                                     | None                                    |

|             |                                                                                              |                                    |
|-------------|----------------------------------------------------------------------------------------------|------------------------------------|
| Patient #71 | <b>16</b> , 43, 71, <b>82</b> , 84, 86, 87, 91, <i>114</i>                                   | 43, 82, <i>114</i>                 |
| Patient #72 | 6, 7, <b>16</b>                                                                              | 7, <b>16</b>                       |
| Patient #73 | <b>16</b>                                                                                    | <b>16</b>                          |
| Patient #74 | <b>16</b>                                                                                    | <b>16</b>                          |
| Patient #75 | <b>16</b> , <b>85</b>                                                                        | <b>16</b>                          |
| Patient #76 | <b>16</b> , 71, <b>82</b>                                                                    | <b>16</b> , <b>82</b>              |
| Patient #77 | 71, <b>82</b>                                                                                | <b>82</b>                          |
| Patient #78 | <b>16</b> , 71, <b>82</b>                                                                    | None                               |
| Patient #79 | <b>16</b> , 71, <b>82</b>                                                                    | None                               |
| Patient #80 | <b>16</b> , <i>19</i> , <b>39</b> , <b>68</b> , <b>70</b> , 71, <b>82</b>                    | <b>70</b>                          |
| Patient #81 | 6, <b>16</b>                                                                                 | <b>16</b>                          |
| Patient #82 | <b>16</b>                                                                                    | <b>16</b>                          |
| Patient #83 | 14, <b>16</b> , 19, 20, 21, 25, 71, <b>82</b> , 152,196                                      | <i>14</i> , <b>16</b> , <i>152</i> |
| Patient #84 | <b>16</b> , <b>90</b>                                                                        | <b>16</b> , <b>90</b>              |
| Patient #85 | <b>16</b> , 71, <b>82</b>                                                                    | <b>16</b>                          |
| Patient #86 | <b>16</b> , 71, <b>82</b>                                                                    | <b>16</b> , 71                     |
| Patient #87 | <i>14</i> , <b>16</b> , <i>19</i> , 20, 71, <b>82</b> , <i>152</i> , <i>195</i> , <i>196</i> | <b>16</b> , <i>196</i>             |
| Patient #88 | <b>16</b> , 71                                                                               | <b>16</b>                          |
| Patient #89 | <b>16</b> , 71, <b>82</b>                                                                    | <b>16</b>                          |
| Patient #90 | <b>16</b> , 71, <b>82</b>                                                                    | None                               |

†Non-bold face indicates Low-risk type; **boldface** indicates High-risk types; *italicized* indicates Undetermined risk Type.
